# Supplementary material for: Tunable Graphene/Nitrocellulose Temperature Alarm Sensors
Source: PubMed Central journal article supplement (PMC9098115; doi:10.1021/acsami.2c02340), 2022-03-11
Supplement: am2c02340_si_001.pdf [file am2c02340_si_001.pdf]

# Supporting Information

## Tunable Graphene/Nitrocellulose Temperature Alarm Sensors

Wenyuan Wei<sup>a</sup>, Yangpeiqi Yi<sup>a</sup>, Jun Song<sup>a</sup>, Xiaogang Chen<sup>a</sup>, Jinhua Li<sup>b</sup>, Jiashen Li<sup>\*a</sup>

<sup>a</sup> Department of Materials, The University of Manchester, Manchester, M13 9PL, UK

<sup>b</sup> Hubei Key Laboratory of Polymer Materials, School of Materials Science and Engineering, Hubei University, Wuhan 430062, China

\*Corresponding author. Tel: +44 (0) 161 306 5993. E-mail: [Jiashen.li@manchester.ac.uk](mailto:Jiashen.li@manchester.ac.uk)

**Table S1.** Tensile properties including the tensile strength, modulus and elongation at break of graphene-matrix composites sensors with different NC content

| Sample  | Tensile stress (MPa) | Modulus (GPa) | Elongation at break (%) |
|---------|----------------------|---------------|-------------------------|
| G@NC60  | 72.95±1.84           | 3.35±0.27     | 3.583±0.69              |
| G@NC75  | 76.98±3.93           | 2.58±0.32     | 5.189±2.03              |
| G@NC90  | 81.51±2.52           | 2.52±0.27     | 12.94±2.87              |
| Pure NC | 82.41±2.60           | 2.60±0.14     | 13.23±1.86              |

**Table S2.** P-value from statistical investigation of response time

|                          | Scheme (a)           | Scheme (b)           |
|--------------------------|----------------------|----------------------|
| Environment Temperatures | 2.98E <sup>-22</sup> | 2.28E <sup>-13</sup> |
| NC contents              | 2.38E <sup>-16</sup> | 2.14E <sup>-04</sup> |
| Interaction              | 8.80E <sup>-19</sup> | 0.436                |

**Table S3.** Ignition time and combustion speed for G@NC75 with different carrier. The data obtained from the Movie S1-S3

|                               | Ignition time (s) | Combustion velocity (cm s <sup>-1</sup> ) |
|-------------------------------|-------------------|-------------------------------------------|
| <b>G@NC75</b>                 | 0.067             | 4.412                                     |
| <b>G@NC75 with Polyimide</b>  | 0.683             | 2.095                                     |
| <b>G@NC75 with Glass side</b> | >10               | /                                         |

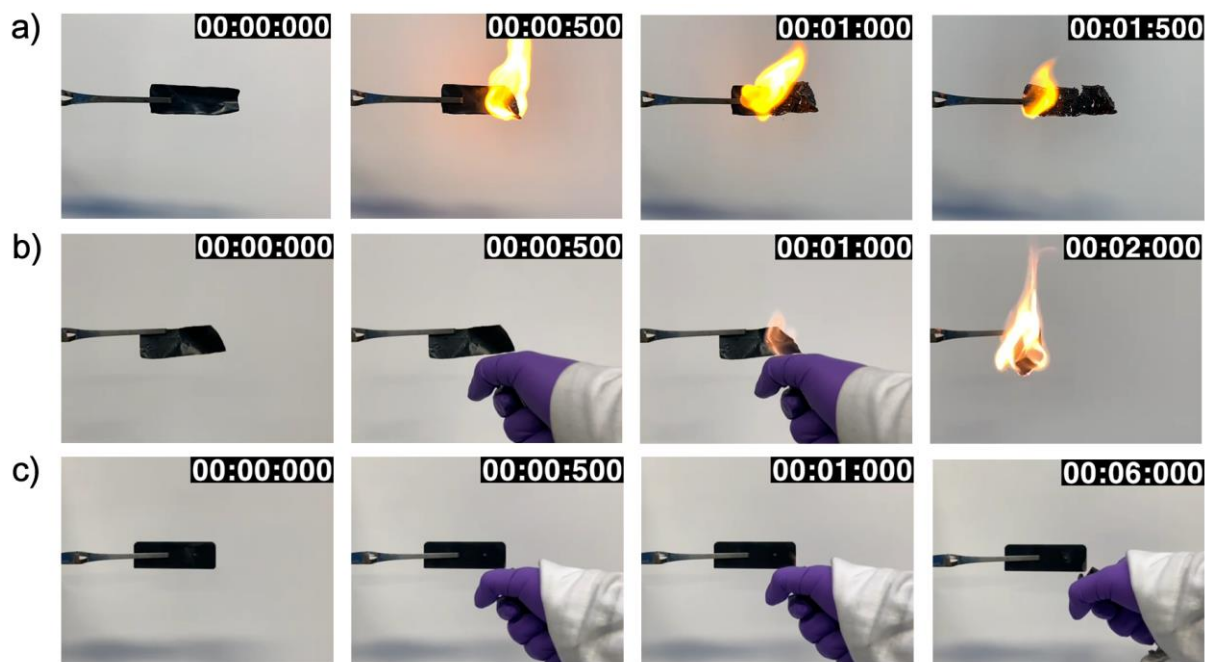

**Figure S1.** Snapshots of flame treatments of G@NC75: (a) pure G@NC75 (b) G@NC75 with Polyimide tape (c) G@NC75 with glass slide. The images were captured from the Movie S1, S2 and S3.

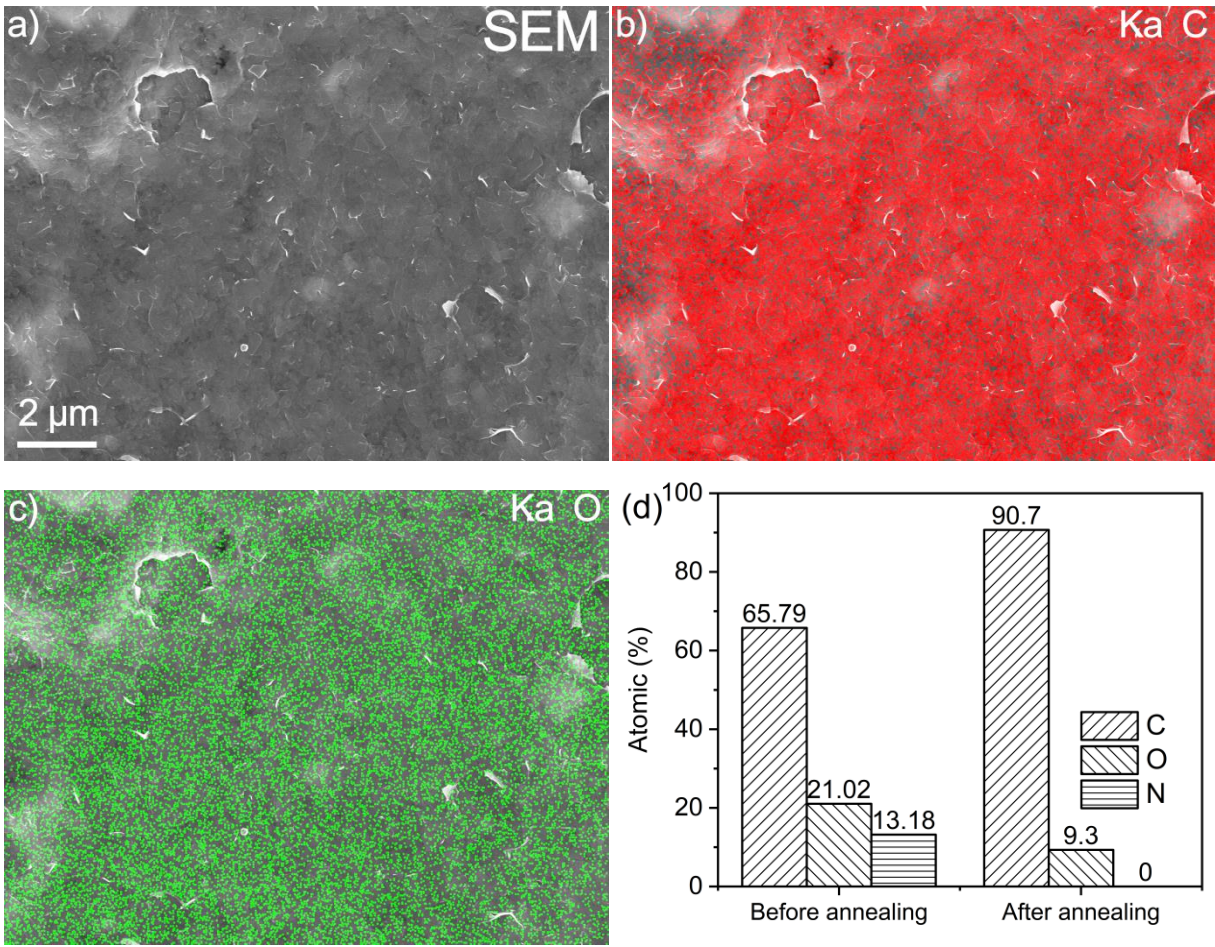

**Figure S2.** EDS data comparison of G@NC75.

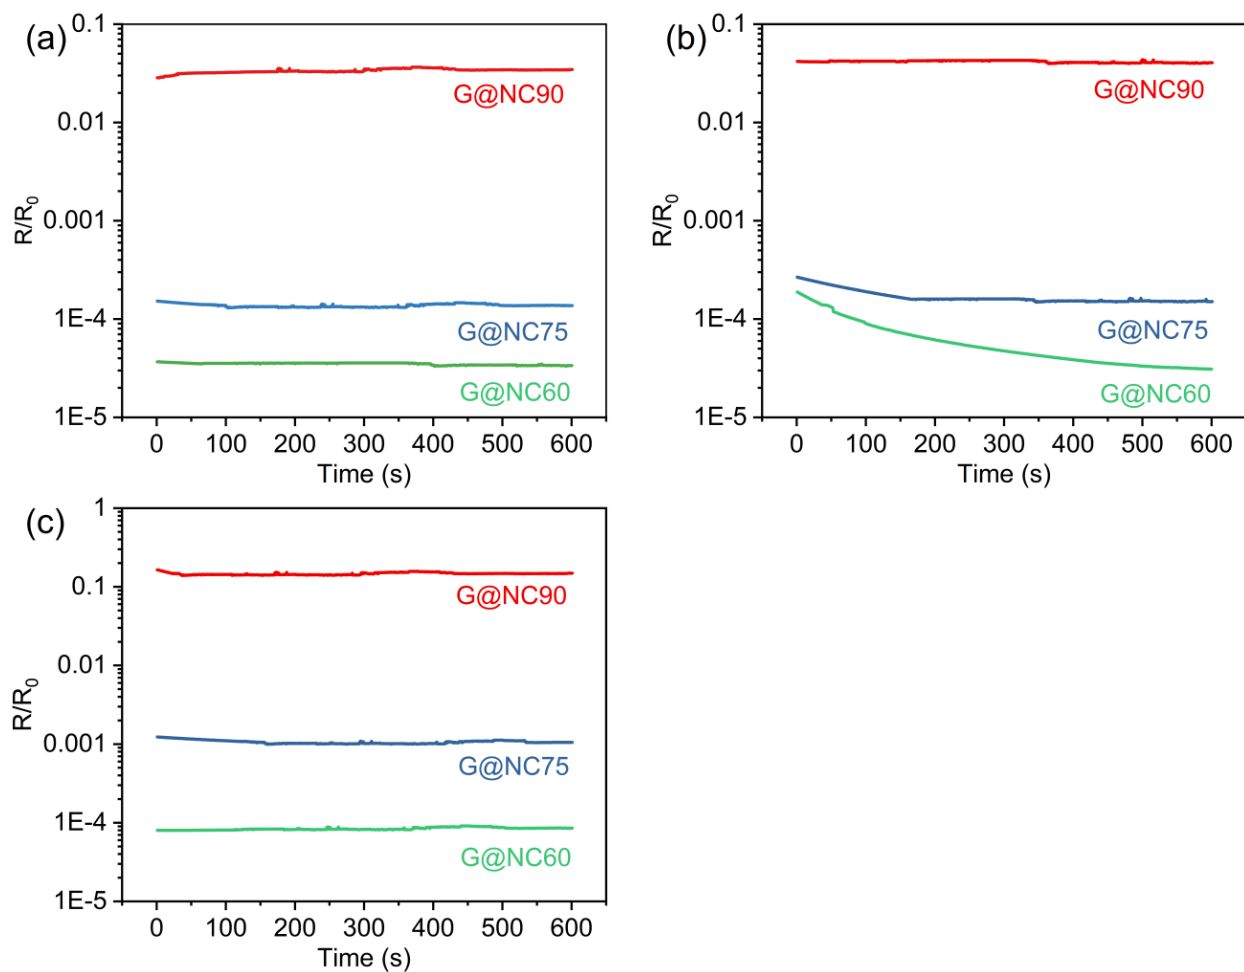

**Figure S3.** Electrical resistance changes of G@NC<sub>x</sub> turning off the heating oven after reaching 260 °C and then leaving for 600 seconds at various heating rate: a) 2.5 °C min<sup>-1</sup>, b) 5.0 °C min<sup>-1</sup>, c) 7.5 °C min<sup>-1</sup>.

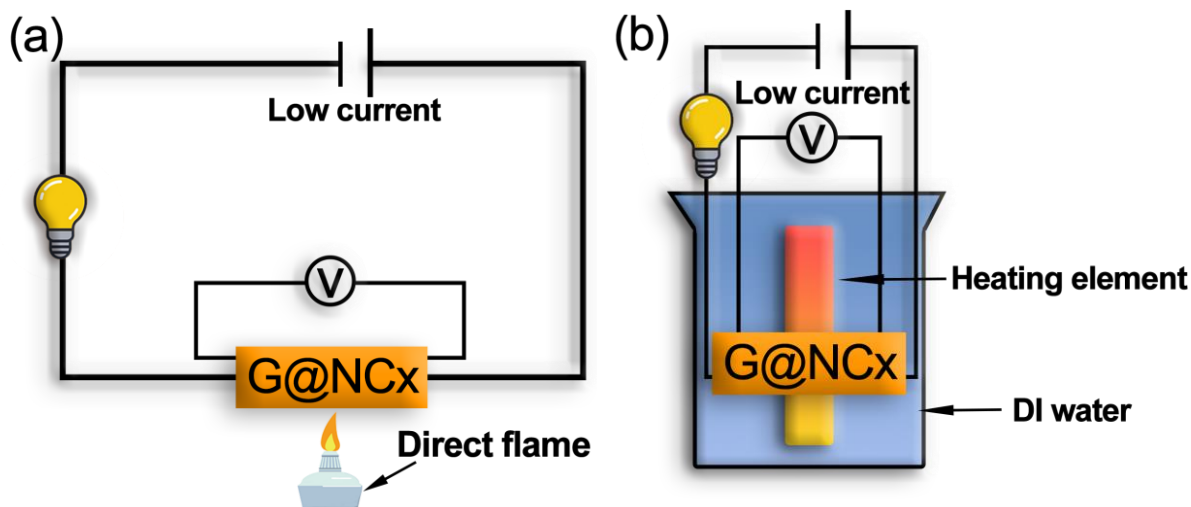

**Figure S4.** Schematic illustration of an electrical circuit for (a) the working process of the G@NCx temperature sensor in the flame. (b) the working process of the G@NCx temperature sensor in the water.

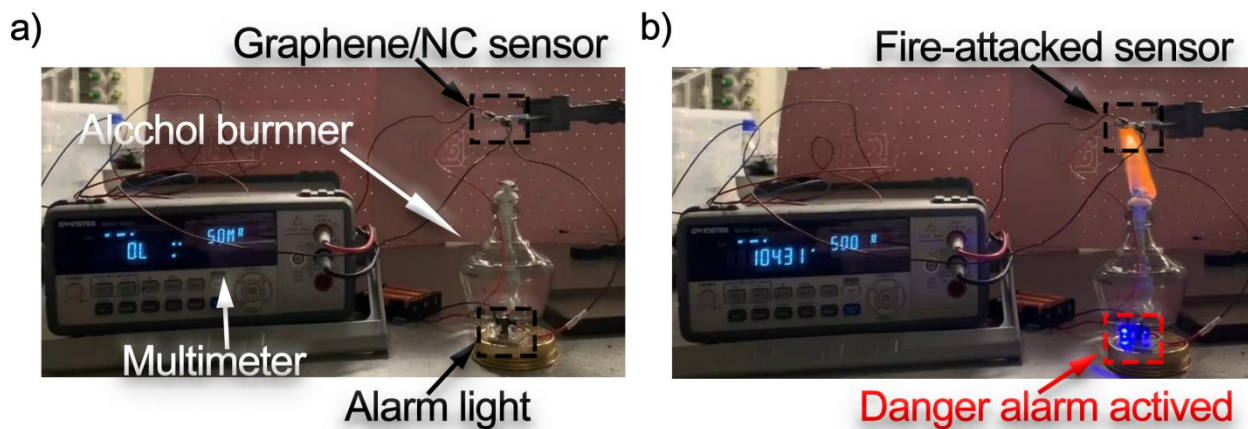

**Figure S5.** Photographs of flame detection processes of flame rapid detection and fire alarm of graphene/NC composites using the alcohol burner. (a) Testing set-up before fire-attack; (b) Testing set-up during fire-attack.

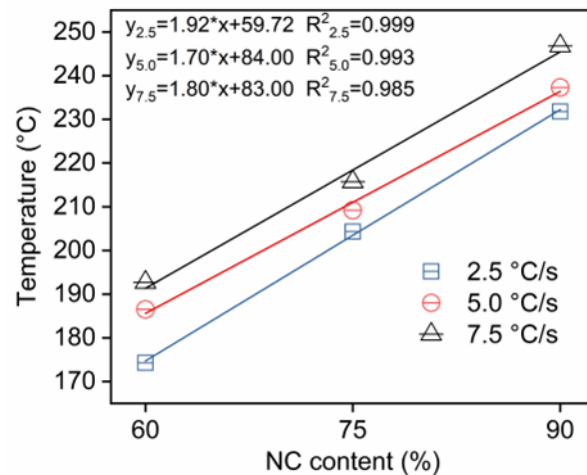

**Figure S6.** Linear relationship between response temperature and NC content.

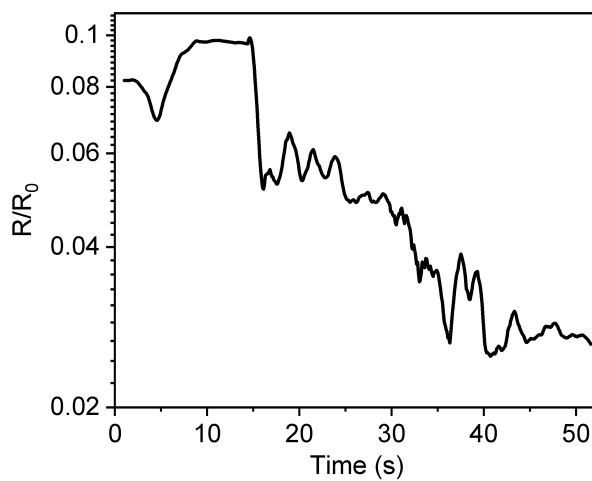

**Figure S7.** Electrical resistance changes of G@NC75 heated in the water environment from turning on the heating element.

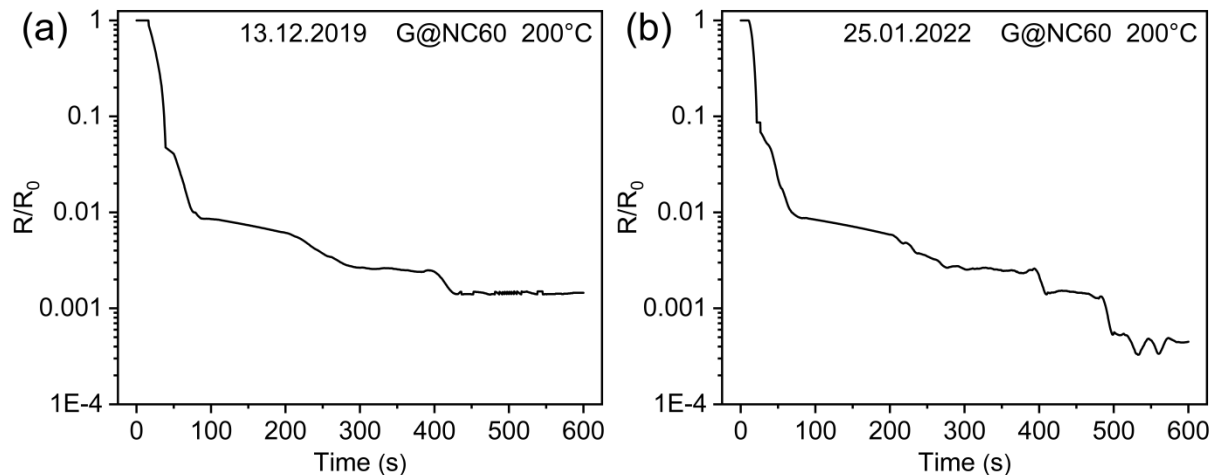

**Figure S8.** Electric resistance changes of G@NC60 sample under an environmental temperature of 200 °C observed in two years.

### Movie Caption:

**Movie S1.** Direct flame treatments of G@NC75.

**Movie S2.** Direct flame treatments of G@NC75 with polyimide (PI) tape.

**Movie S3.** Direct flame treatments of G@NC75 with glass slide.

**Movie S4.** The combustion of G@NC75 tunable temperature sensor in the water with a heating element.

**Movie S5.** The combustion of G@NC60 tunable temperature sensor in the flame of the alcohol lamp.

**Movie S6.** The combustion of G@NC75 tunable temperature sensor in the flame of the alcohol lamp.

**Movie S7.** The combustion of G@NC90 tunable temperature sensor in the flame of the alcohol lamp.
